# Supplementary material for: Short-Term Observations of Rainfall Chemistry Composition in Bellsund (SW Spitsbergen, Svalbard)
Source: MDPI journal article supplement (doi:10.3390/w16020299), 2024-01-15
Supplement: s1 [file s1]

Archive with 2 entries (2 files):
- Supplementary Material S1. Volcanic activity and Siberian wildfires.pdf
- Table S1.pdf
