# Supplementary material for: Short-Term Observations of Rainfall Chemistry Composition in Bellsund (SW Spitsbergen, Svalbard)
Source: MDPI journal article supplement (doi:10.3390/w16020299), 2024-01-15
Supplement: s1 [file s1 › Table S1.pdf]

**Table S1.** Values of Spearman rank correlation coefficient ( $r_s$ ) of the meteorological data, physicochemical parameters, ions and elements in rainfall. Statistically significant relations (at  $\alpha=0.05$ ) are marked in bold and highlighted in grey (modified after a previous work in Chemosphere [5]).

|                                    | <i>T</i> | <i>pH</i> | <i>SEC</i> | <i>DOC</i> | <i>Cl<sup>-</sup></i> | <i>SO<sub>4</sub><sup>2-</sup></i> | <i>nss</i> | <i>nss [%]</i> | <i>Ag</i> | <i>Al</i> | <i>As</i> | <i>Bi</i> | <i>Ca</i> | <i>Cd</i> | <i>Co</i> | <i>Cr</i> | <i>Fe</i> | <i>K</i> | <i>nsK</i> | <i>nsK [%]</i> | <i>Li</i> | <i>Mg</i> | <i>Mn</i> | <i>Mo</i> | <i>Na</i> | <i>Ni</i> | <i>Pb</i> | <i>Sb</i> | <i>Se</i> | <i>Sr</i> | <i>V</i> | <i>Zn</i> |
|------------------------------------|----------|-----------|------------|------------|-----------------------|------------------------------------|------------|----------------|-----------|-----------|-----------|-----------|-----------|-----------|-----------|-----------|-----------|----------|------------|----------------|-----------|-----------|-----------|-----------|-----------|-----------|-----------|-----------|-----------|-----------|----------|-----------|
| <i>P</i>                           | -0.077   | 0.005     | -0.068     | -0.509     | 0.064                 | 0.132                              | 0.009      | 0.005          | -0.378    | -0.196    | -0.032    | 0.023     | -0.055    | -0.397    | -0.437    | -0.064    | 0.342     | 0.146    | -0.205     | -0.082         | 0.128     | 0.009     | -0.255    | 0.159     | 0.055     | 0.282     | 0.005     | -0.055    | -0.358    | -0.083    | 0.018    | -0.474    |
| <i>T</i>                           | -0.464   | -0.579    | 0.137      | -0.655     | -0.591                | -0.169                             | 0.655      | 0.209          | -0.300    | 0.518     | 0.773     | 0.327     | -0.219    | 0.345     | 0.145     | -0.618    | -0.136    | 0.428    | 0.645      | 0.333          | -0.582    | 0.027     | 0.700     | -0.645    | 0.191     | -0.255    | 0.670     | 0.260     | -0.202    | 0.727     | 0.064    |           |
| <i>pH</i>                          | 0.542    | 0.433     | 0.600      | 0.591      | 0.246                 | -0.464                             | 0.291      | 0.264          | -0.236    | -0.355    | -0.118    | 0.073     | -0.364    | 0.045     | 0.418     | 0.118     | -0.319    | -0.682   | -0.178     | 0.555          | -0.300    | -0.282    | 0.555     | -0.373    | 0.136     | -0.606    | -0.264    | 0.193     | -0.173    | -0.136    |          |           |
| <i>SEC</i>                         | -0.139   | 0.970     | 0.893      | -0.021     | -0.961                | -0.164                             | 0.560      | 0.041          | -0.278    | 0.328     | -0.112    | 0.169     | 0.405     | 0.196     | 0.542     | -0.091    | -0.888    | 0.315    | 0.989      | 0.187          | -0.260    | 0.952     | 0.282     | 0.023     | -0.370    | -0.189    | 0.800     | -0.205    | -0.342    |           |          |           |
| <i>DOC</i>                         | -0.087   | -0.009    | 0.374      | 0.255      | 0.478                 | 0.032                              | -0.055     | -0.073         | -0.005    | 0.477     | 0.064     | 0.123     | -0.018    | -0.018    | 0.365     | 0.150     | -0.256    | -0.123   | 0.082      | -0.164         | -0.077    | -0.702    | 0.014     | -0.235    | -0.057    | -0.280    | 0.055     | 0.478     |           |           |          |           |
| <i>Cl<sup>-</sup></i>              | 0.964    | 0.146     | -0.927     | -0.155     | 0.573                 | -0.009                             | -0.345     | 0.273          | -0.064    | 0.100     | 0.418     | 0.355     | 0.609     | -0.055    | -0.873    | 0.255     | 0.991     | 0.173    | -0.309     | 0.991          | 0.218     | 0.091     | -0.442    | -0.251    | 0.716     | -0.255    | -0.318    |           |           |           |          |           |
| <i>SO<sub>4</sub><sup>2-</sup></i> | 0.305    | -0.809    | -0.109     | 0.645      | 0.027                 | -0.291                             | 0.345      | 0.027          | 0.164     | 0.445     | 0.464     | 0.727     | 0.105     | -0.755    | 0.287     | 0.945     | 0.255     | -0.218   | 0.982      | 0.227          | 0.173     | -0.428    | -0.241    | 0.697     | -0.173    | -0.191    |           |           |           |           |          |           |
| <i>nss</i>                         | 0.169    | 0.597     | 0.415      | 0.205      | 0.073                 | -0.073                             | 0.311      | 0.237          | 0.328     | 0.597     | 0.251     | 0.196     | 0.155     | -0.055    | 0.096     | -0.041    | 0.105     | 0.200    | -0.064     | 0.574          | 0.053     | 0.384     | -0.133    | 0.169     | 0.346     |           |           |           |           |           |          |           |
| <i>nss [%]</i>                     | 0.282    | -0.418    | 0.109      | 0.400      | -0.164                | 0.128                              | -0.018     | -0.318         | -0.109    | -0.445    | 0.187     | 0.918     | -0.205    | -0.936    | -0.155    | 0.427     | -0.891    | -0.227   | 0.027      | 0.396          | 0.260     | -0.688    | 0.382     | 0.409     |           |           |           |           |           |           |          |           |
| <i>Ag</i>                          | 0.227    | 0.309     | 0.391      | -0.209     | 0.337                 | 0.227                              | 0.300      | -0.018         | -0.200    | -0.032    | 0.209     | -0.032    | -0.136    | -0.236    | 0.255     | -0.164    | -0.136    | 0.582    | 0.374      | 0.747          | -0.229    | 0.418     | 0.427     |           |           |           |           |           |           |           |          |           |
| <i>Al</i>                          | 0.318    | 0.082     | 0.464      | 0.182      | 0.527                 | 0.427                              | 0.300      | 0.745          | 0.314     | -0.209    | 0.401     | 0.600     | 0.582     | 0.109     | 0.645     | 0.445     | 0.291     | 0.105    | 0.273      | 0.596          | 0.182     | 0.318     |           |           |           |           |           |           |           |           |          |           |
| <i>As</i>                          | 0.900    | 0.700     | -0.150     | 0.764      | 0.736                 | -0.264                             | 0.245      | 0.305          | 0.273     | 0.866     | 0.064     | 0.209     | 0.809     | 0.018     | 0.664     | 0.191     | 0.724     | 0.533    | 0.395      | 0.900          | 0.036     |           |           |           |           |           |           |           |           |           |          |           |
| <i>Bi</i>                          | 0.527    | -0.146    | 0.609      | 0.518      | -0.418                | 0.018                              | 0.264      | 0.491          | 0.733     | -0.264    | 0.073     | 0.909     | -0.327    | 0.582     | 0.182     | 0.843     | 0.597     | 0.147    | 0.964      | 0.100          |           |           |           |           |           |           |           |           |           |           |          |           |
| <i>Ca</i>                          | -0.087   | 0.727     | 0.545      | -0.145     | 0.609                 | 0.556                              | 0.027      | 0.856          | 0.336     | 0.591     | 0.573     | 0.336     | 0.582     | -0.136    | 0.246     | -0.023    | 0.734     | 0.609    | 0.045      |                |           |           |           |           |           |           |           |           |           |           |          |           |
| <i>Cd</i>                          | 0.210    | 0.096     | 0.096      | -0.032     | 0.240                 | 0.214                              | -0.116     | -0.100         | 0.369     | -0.269    | -0.014    | -0.396    | 0.647     | -0.148    | 0.276     | -0.092    | -0.150    | 0.875    |            |                |           |           |           |           |           |           |           |           |           |           |          |           |
| <i>Co</i>                          | 0.691    | -0.264    | 0.445      | 0.620      | 0.264                 | 0.715                              | 0.182      | 0.609          | 0.500     | 0.173     | 0.555     | 0.227     | 0.569     | 0.547     | 0.523     | 0.591     | 0.373     |          |            |                |           |           |           |           |           |           |           |           |           |           |          |           |
| <i>Cr</i>                          | -0.255   | 0.518     | 0.446      | -0.118     | 0.733                 | 0.455                              | 0.373      | 0.282          | 0.427     | 0.436     | 0.291     | 0.442     | 0.351     | 0.431     | 0.491     | 0.036     |           |          |            |                |           |           |           |           |           |           |           |           |           |           |          |           |
| <i>Fe</i>                          | 0.164    | -0.273    | -0.227     | -0.255     | 0.273                 | -0.218                             | -0.118     | 0.400          | -0.091    | 0.345     | -0.542    | -0.169    | 0.083     | -0.255    | 0.018     |           |           |          |            |                |           |           |           |           |           |           |           |           |           |           |          |           |
| <i>K</i>                           | 0.647    | -0.236    | 0.469      | 0.618      | 0.709                 | 0.036                              | 0.682      | 0.445          | -0.073    | 0.014     | -0.191    | 0.560     | 0.091     | 0.027     |           |           |           |          |            |                |           |           |           |           |           |           |           |           |           |           |          |           |
| <i>nsK</i>                         | 0.396    | 0.331     | -0.032     | 0.774      | 0.159                 | 0.032                              | 0.118      | -0.159         | 0.288     | -0.023    | 0.101     | 0.269     | 0.410     |           |           |           |           |          |            |                |           |           |           |           |           |           |           |           |           |           |          |           |
| <i>nsK [%]</i>                     | 0.005    | -0.864    | 0.182      | 0.445      | -0.809                | -0.009                             | 0.064      | 0.588          | 0.378     | -0.541    | 0.427     | 0.545     |           |           |           |           |           |          |            |                |           |           |           |           |           |           |           |           |           |           |          |           |
| <i>Li</i>                          | 0.328    | 0.415     | 0.674      | 0.287      | 0.784                 | 0.146                              | 0.516      | 0.269          | 0.690     | 0.729     | -0.046    |           |           |           |           |           |           |          |            |                |           |           |           |           |           |           |           |           |           |           |          |           |
| <i>Mg</i>                          | 0.200    | -0.236    | 0.982      | 0.300      | 0.073                 | -0.360                             | -0.187     | 0.780          | -0.182    | -0.327    |           |           |           |           |           |           |           |          |            |                |           |           |           |           |           |           |           |           |           |           |          |           |
| <i>Mn</i>                          | -0.036   | 0.264     | 0.282      | -0.055     | 0.187                 | -0.018                             | 0.376      | 0.055          | 0.500     |           |           |           |           |           |           |           |           |          |            |                |           |           |           |           |           |           |           |           |           |           |          |           |
| <i>Mo</i>                          | -0.273   | 0.618     | 0.127      | 0.651      | 0.451                 | 0.239                              | 0.945      | 0.009          |           |           |           |           |           |           |           |           |           |          |            |                |           |           |           |           |           |           |           |           |           |           |          |           |
| <i>Na</i>                          | 0.255    | 0.118     | -0.424     | -0.232     | 0.743                 | -0.227                             | -0.236     |                |           |           |           |           |           |           |           |           |           |          |            |                |           |           |           |           |           |           |           |           |           |           |          |           |
| <i>Ni</i>                          | 0.100    | 0.592     | 0.355      | 0.615      | 0.527                 | -0.236                             |            |                |           |           |           |           |           |           |           |           |           |          |            |                |           |           |           |           |           |           |           |           |           |           |          |           |
| <i>Pb</i>                          | 0.141    | 0.656     | 0.064      | 0.164      | 0.518                 |                                    |            |                |           |           |           |           |           |           |           |           |           |          |            |                |           |           |           |           |           |           |           |           |           |           |          |           |
| <i>Sb</i>                          | 0.715    | -0.074    | 0.706      | 0.150      |                       |                                    |            |                |           |           |           |           |           |           |           |           |           |          |            |                |           |           |           |           |           |           |           |           |           |           |          |           |
| <i>Se</i>                          | -0.005   | 0.510     | 0.433      |            |                       |                                    |            |                |           |           |           |           |           |           |           |           |           |          |            |                |           |           |           |           |           |           |           |           |           |           |          |           |
| <i>Sr</i>                          | 0.220    | -0.165    |            |            |                       |                                    |            |                |           |           |           |           |           |           |           |           |           |          |            |                |           |           |           |           |           |           |           |           |           |           |          |           |
| <i>V</i>                           | 0.109    |           |            |            |                       |                                    |            |                |           |           |           |           |           |           |           |           |           |          |            |                |           |           |           |           |           |           |           |           |           |           |          |           |
| <i>Zn</i>                          |          |           |            |            |                       |                                    |            |                |           |           |           |           |           |           |           |           |           |          |            |                |           |           |           |           |           |           |           |           |           |           |          |           |
